# Supplementary material for: The Ecological Importance of Toxicity: Sea Anemones Maintain Toxic Defence When Bleached
Source: PubMed Central journal article supplement (PMC6563229; doi:10.3390/toxins11050266), 2019-05-11
Supplement: toxins-11-00266-s001.pdf [file toxins-11-00266-s001.pdf]

# Supplementary Materials: The ecological importance of toxicity: Sea anemones maintain toxic defence when bleached

Cassie M. Hoepner, Catherine A. Abbott and Karen Burke da Silva

**Table S1.** Change in intensity (adjusted volume) of protein bands from the gel electrophoresis throughout the bleaching process. Quantification was performed in Image Lab 6.0 (BioRad, USA)

|                  | Week | 11 kDa    | 16 kDa  | 18 kDa  | 75 kDa  |
|------------------|------|-----------|---------|---------|---------|
| <b>Anemone 1</b> | 0    | 1,290,678 | 560,967 | 0       | 79,121  |
|                  | 9    | 1,949,873 | 434,449 | 251,766 | 109,624 |
|                  | 18   | 96,276    | 9,727   | 0       | 0       |
| <b>Anemone 2</b> | 0    | 165,217   | 24,211  | 0       | 29,110  |
|                  | 9    | 203,273   | 52,256  | 25,347  | 56,232  |
|                  | 18   | 236,785   | 6,603   | 0       | 0       |

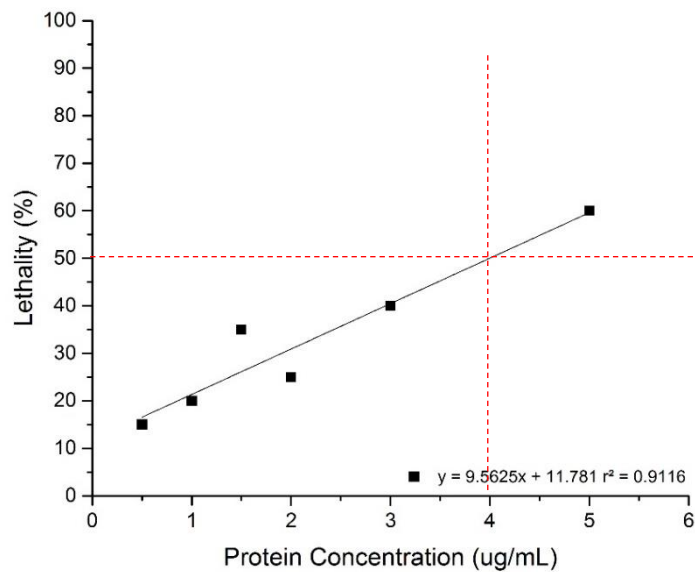

**Figure S1.** Determination of protein concentration to achieve approximately 50% lethality for week 0 anemone venom samples (n = 1).

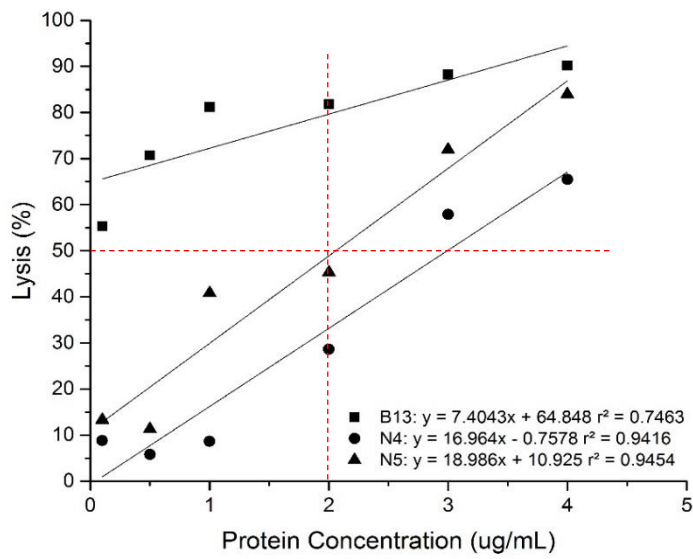

**Figure S2.** Determination of protein concentration to achieve approximately 50% lysis for week 0 anemone venom samples (n = 3).

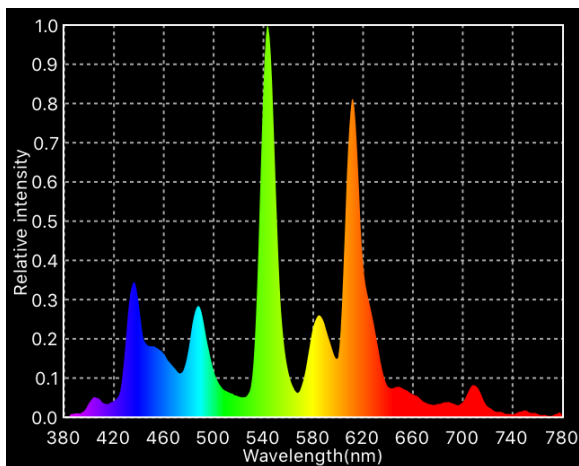

(a)

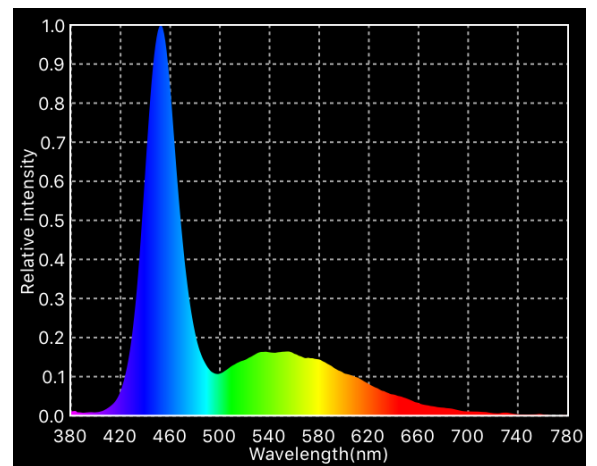

(b)

**Figure S3.** Wavelength of light anemones from each group were exposed to over a period of 5 months to gradually induce bleaching (a) Fluorescent lighting (b) LED lighting. Wavelengths were measured using a Lighting Passport Essence (AsenseTek, Taiwan).
